# Supplementary material for: An electrochemical method for the sensitive and rapid sensing of Sudan I in food based on Ni–Fe bimetal organic frameworks
Source: Royal Society of Chemistry journal article supplement (doi:10.1039/d1nj02730a), 2021-01-01
Supplement: d1nj02730a1.pdf [file d1nj02730a1.pdf]

## Electronic Supplementary Information

### **An Electrochemical Method for Sensitively and Rapidly Sensing of Sudan I in Food Based on the Ni-Fe Bimetal Organic Frameworks**

Xueyan Li,<sup>a</sup> Xiuxiu Sun,<sup>a</sup> Ani Zhou,<sup>a</sup> Zichun Zhu\*<sup>b</sup> and Maoguo Li\*<sup>a</sup>

<sup>a</sup> Anhui Key Laboratory of Chemo-Biosensing, College of Chemistry and Materials Science,

Anhui Normal University, Wuhu 241000, China

<sup>b</sup> School of Materials and Environment Engineering, Chizhou Universtiy, Chizhou 247000, China

Corresponding author information:

*E-mail addresses:* [tjhxzzc@163.com](mailto:tjhxzzc@163.com) (Z. Zhu); [limaoguo@mail.ahnu.edu.cn](mailto:limaoguo@mail.ahnu.edu.cn) (M. Li)

## **Chemicals and reagents**

Zinc nitrate hexahydrate and nickel chloride hexahydrate were purchased from Xilong Scientific Co.,Ltd. Ferric chloride hexahydrate and N,N-dimethylformamide(DMF) and anhydrous ethanol were purchased from Sinopharmaceutical Chemical Reagents Co., Ltd. Acetylene black was purchased from the battery sales department of Yingze District, Taiyuan City. Nafion (5% in water) was purchased from Alfa Aesar. Sudan I was purchased from Shanghai Aladdin Biochemical Technology Co., Ltd. The phosphate buffer solution is configured by mixing  $\text{Na}_2\text{HPO}_4$  and  $\text{KH}_2\text{PO}_4$  reserve solutions. All solution configurations use deionized water (Millipore,  $\geq 18.2 \text{ M}\Omega \text{ cm}^{-1}$ ).

## **Apparatus**

Cyclic voltammetry (CV) and differential voltammetry (DPV) experiments were performed using electrochemical workstation (CHI440a). The morphology of the prepared samples was tested by scanning electron microscopy (SEM, Hitachi S-8100) and transmission electron microscopy (TEM, Hitachi-7700). The composition of the material was tested by the energy dispersive X-ray detector (EDS). The crystallinity and purity of the material were tested by the X-ray diffractometer (XRD, Rigaku Rint-2200/XRD-600). The specific surface area and pore size distribution of the samples were investigated by nitrogen adsorption and desorption experiments. (BET, ASAP 2460, Micromeritics, US). A traditional three-electrode system consisting of a modified glassy carbon electrode (GCE) as a working electrode, saturated calomel electrode as a reference electrode and platinum wire as a reference electrode. All experiments were carried out at room temperature.

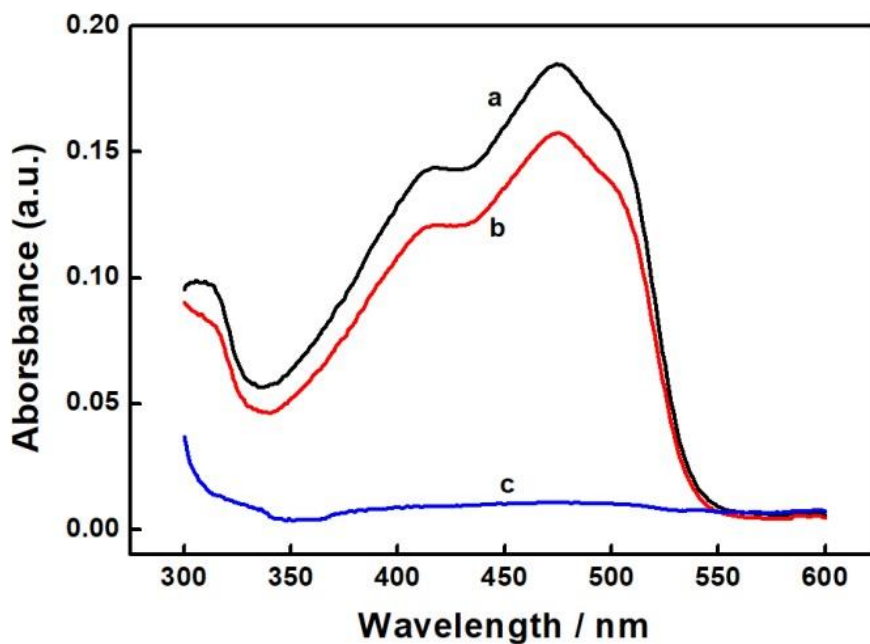

**Fig. S1.** The UV spectra of  $10^{-5}$  M Sudan I (a), the centrifugate after 1h adsorpting by MIL-53(NiFe) (b) and the centrifugate after 1h adsorpting by AB (c).

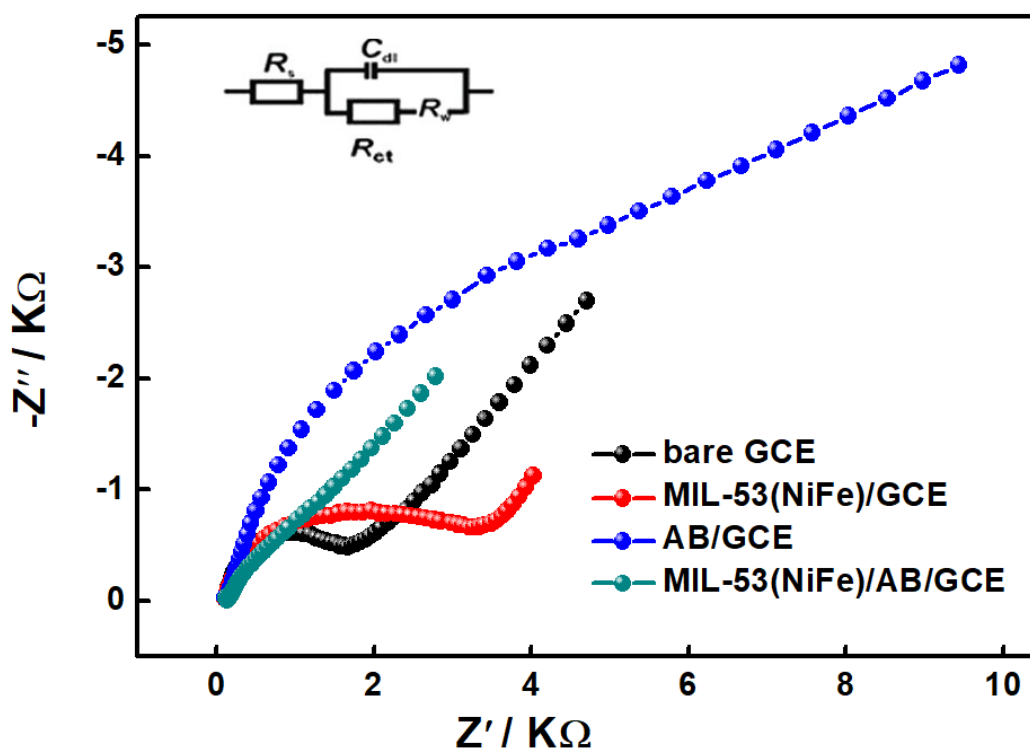

**Fig. S2.** EIS of bare GCE, MIL-53(NiFe)/GCE, AB/GCE and MIL-53(NiFe)/AB/GCE in 0.1 M KCl containing 0.25 Mm  $\text{Fe}(\text{CN})_6^{3-/4-}$  in a frequency range from 0.01 Hz to 10 MHz.

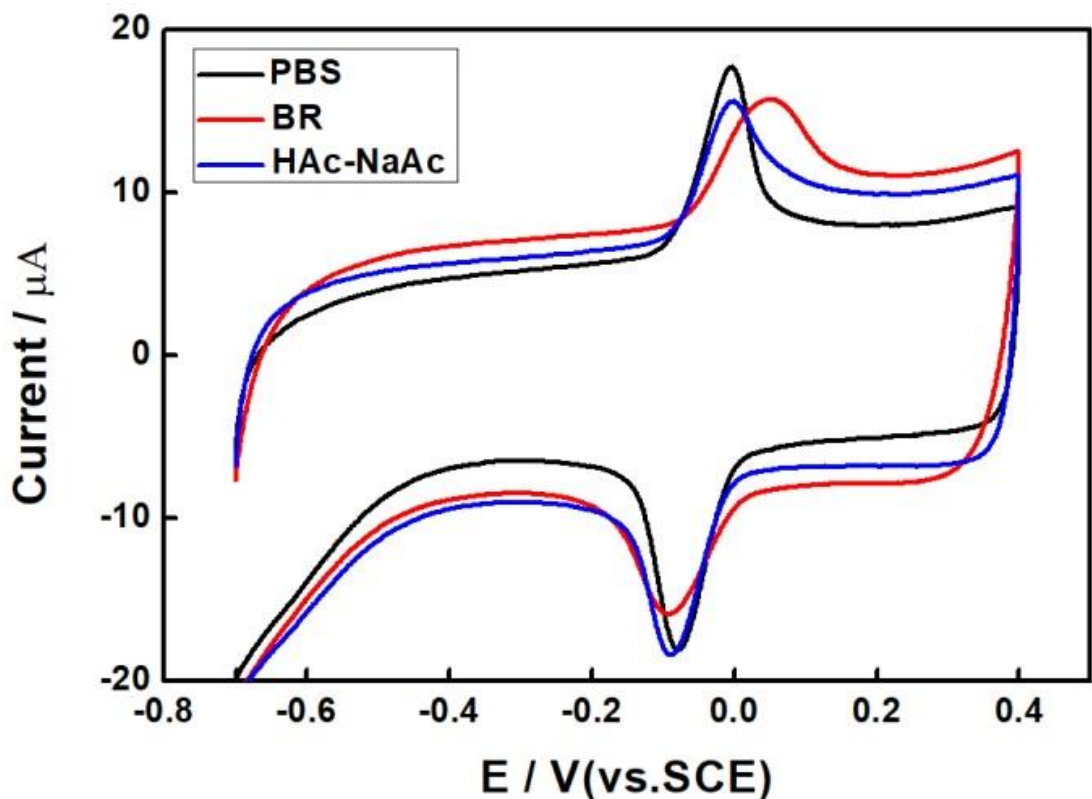

Fig. S3. Plots of peak current vs. different buffer solutions.

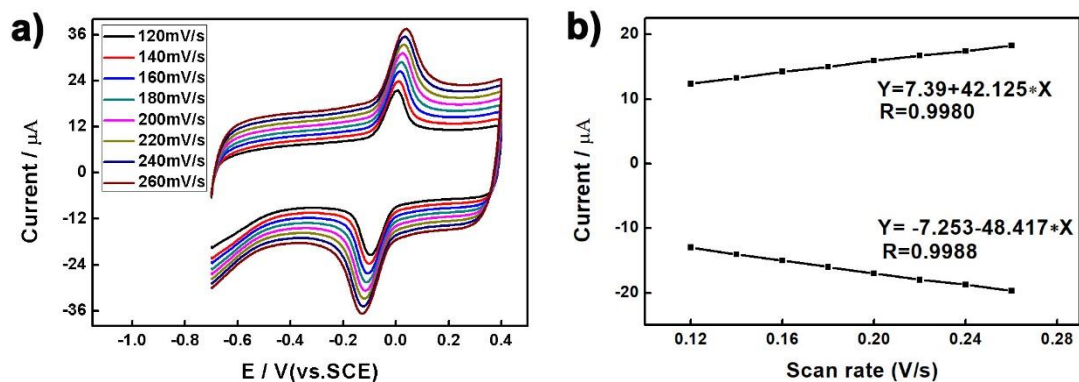

Fig. S4. (a) CV curves of MIL-53(NiFe)/AB/GCE at different scan rates (scan rates are 120, 140, 160, 180, 200, 220, 240, and 260 mV/s), (b) Fitting curve of peak current and scan rates.

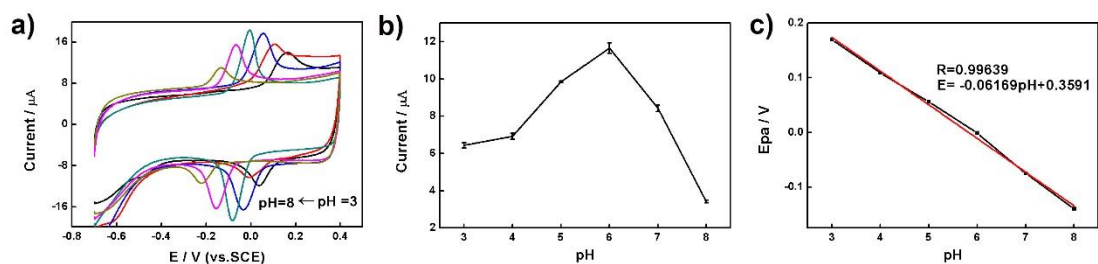

Fig. S5. (a) CV curves of different pH, (b) the line chart of O<sub>1</sub> peak current vs. pH and (c) fitting curve of the peak potential with different pH.

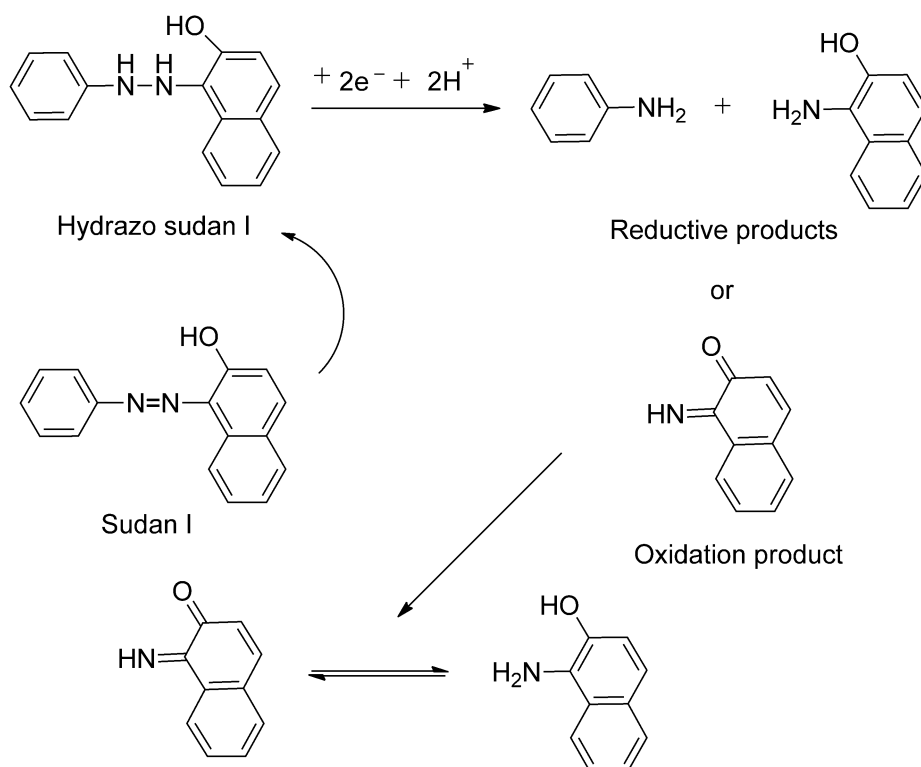

**Scheme S1.** The electrochemical redox mechanism of Sudan I.

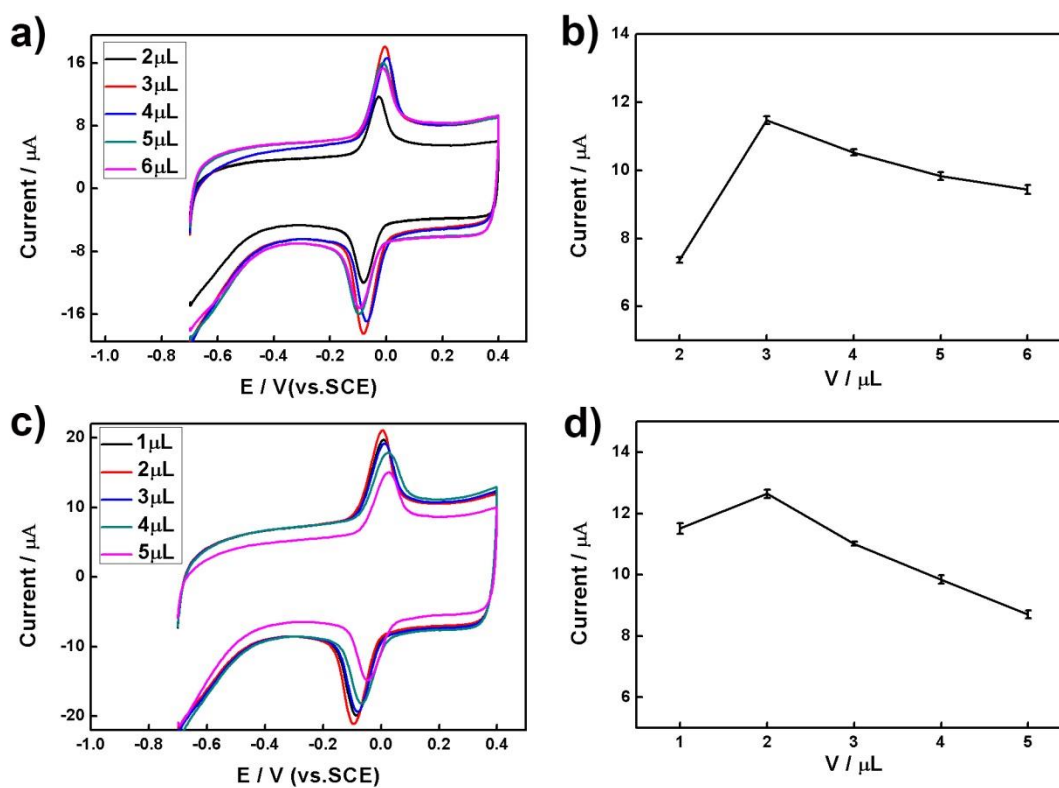

**Fig. S6.** (a) and (c) The effects of different modifiers of AB and MIL-53(NiFe) on the peak current for 50 μM Sudan I respectively, (b) and (d) Line chart of O<sub>1</sub> current vs. amount of modifier of AB and MIL-53(NiFe).

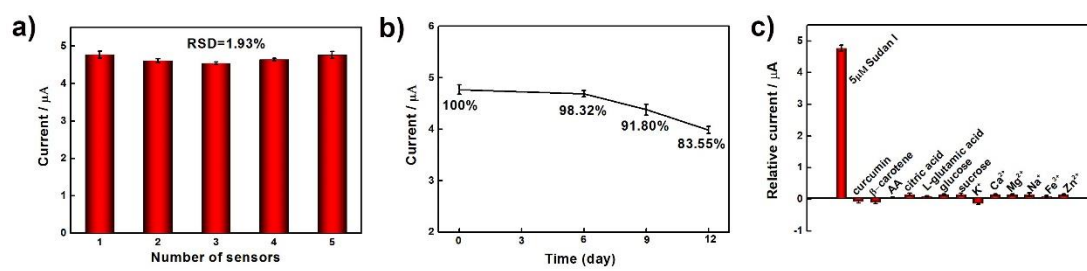

**Fig. S7.** The (a) repeatability, (b) stability and (c) selectivity.
